# Supplementary material for: Structural Basis for the Selective Inhibition of Cdc2-Like Kinases by CX-4945
Source: Hindawi journal article supplement (doi:10.1155/2019/6125068), 2019-08-18
Supplement: f1 [file 6125068.f1.pdf]

## Supplementary Materials

### Structural basis for the selective inhibition of Cdc2-like kinases by CX-4945

Joo Youn Lee<sup>1,6</sup>, Ji-Sook Yun<sup>1,6</sup>, Woo-Keun Kim<sup>2</sup>, Hang-Suk Chun<sup>2</sup>, Hyeonseok Jin<sup>3</sup>, Sungchan Cho<sup>4,5\*</sup>, and Jeong Ho Chang<sup>1,3\*</sup>

<sup>1</sup>Department of Biology Education, Kyungpook National University, 80 Daehak-ro, Buk-gu, Daegu 41566, South Korea; <sup>2</sup>Biosystem Research Group, Korea Institute of Toxicology, 141 Gajeong-ro, Yuseong-gu, Daejeon 34114, South Korea; <sup>3</sup>Research Institute for Phylogenomics and Evolution, Kyungpook National University, 80 Daehak-ro, Buk-gu, Daegu 41566, South Korea; <sup>4</sup>Natural Medicine Research Center, Korea Research Institute of Bioscience and Biotechnology, 30 Yeongudanji-ro, Ochang-eup, Cheongju-si, Chungbuk 28116, South Korea; <sup>5</sup>Department of Biomolecular Science, Korea University of Science and Technology, 217 Gajeong-ro, Gajeong-dong, Yuseong-gu, Daejeon 34113, South Korea

<sup>6</sup>These authors contribute equally to this work

Running title: Crystal structures of CLK isoforms in complex with CX-4945

Keywords: Cdc2-like kinase, Casein kinase, CX-4945, Alternative splicing, X-ray crystallography

---

\*Correspondence information

Sungchan Cho

Phone: +82-43-240-6105, E-mail: [Sungchan@kribb.re.kr](mailto:Sungchan@kribb.re.kr)

Jeong Ho Chang

Phone: +82-53-950-5913, E-mail: [jhcbio@knu.ac.kr](mailto:jhcbio@knu.ac.kr)

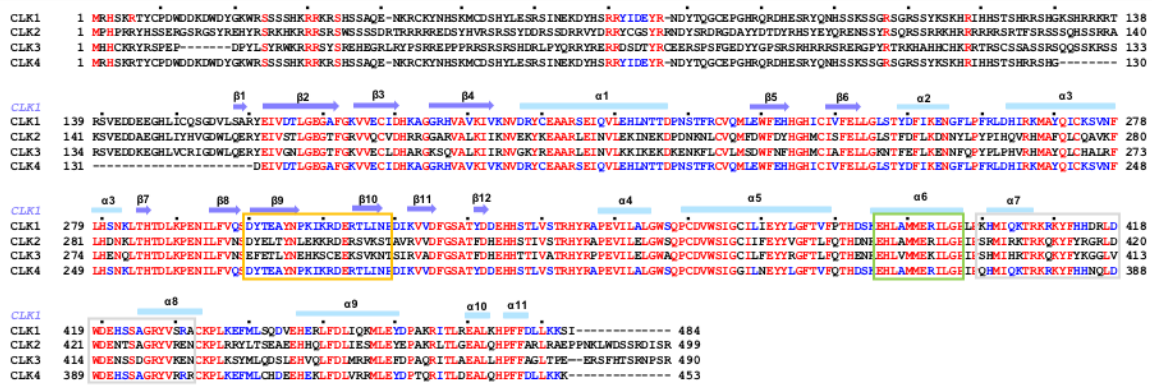

**Supplementary Figure 1. Sequence alignment of the four isoforms of CLKs.** Amino acid sequences of the CLK1, CLK2, CLK3, and CLK4 proteins are aligned, and 100% identical residues are colored in red. Identical residues in CLK1 and CLK4 are colored in blue. The  $\alpha$ -helix of CLK1 is colored in sky blue, and  $\beta$ -sheet is colored in purple. The common features of CLK are shown in solid line boxes ( $\beta$ -hairpin insertion: yellow; EHLAMMERILG motif: light green; MAPK-like

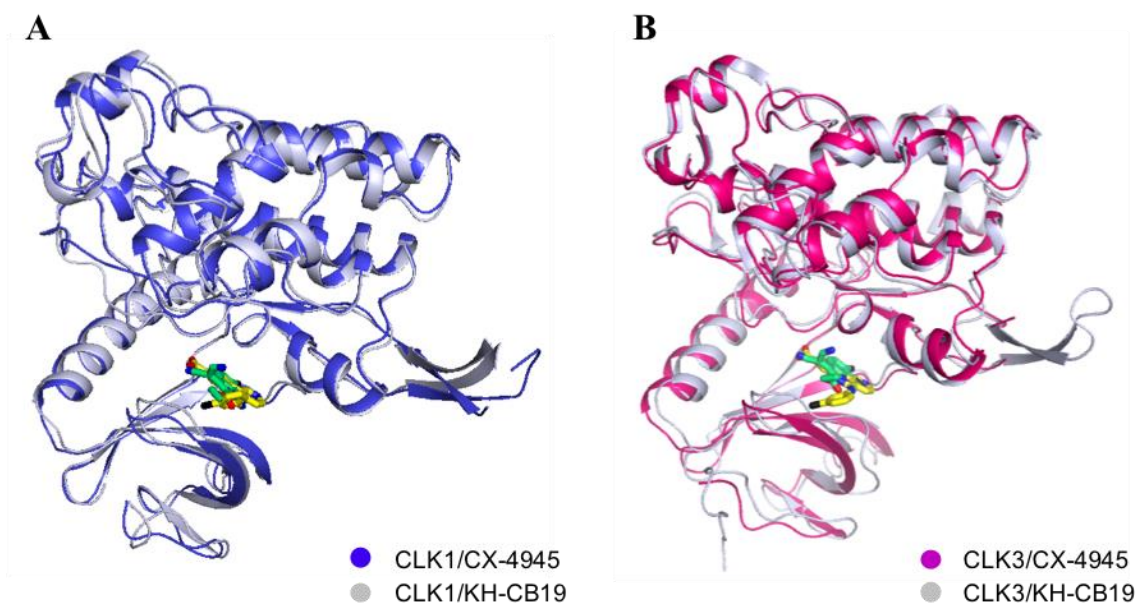

**Supplementary Figure 2. Structural comparison of CLKs with the inhibitors CX-4945 and KH-CB19.** (A) Superimposed structures of CLK1/CX-4945 (blue) and CLK1/KH-CB19 (PDB code, 2VAG; gray) structures. The CX-4945 and KH-CB19 molecules are colored in yellow and green, respectively. (B) Superimposed structures of CLK3/CX-4945 (magenta) and CLK3/KH-CB19 (PDB code, 2WUT; gray). The CX-4945 and KH-CB19 molecules are colored in yellow and green, respectively. Nitrogen, oxygen, and chlorine are colored in blue, red, and black, respectively.

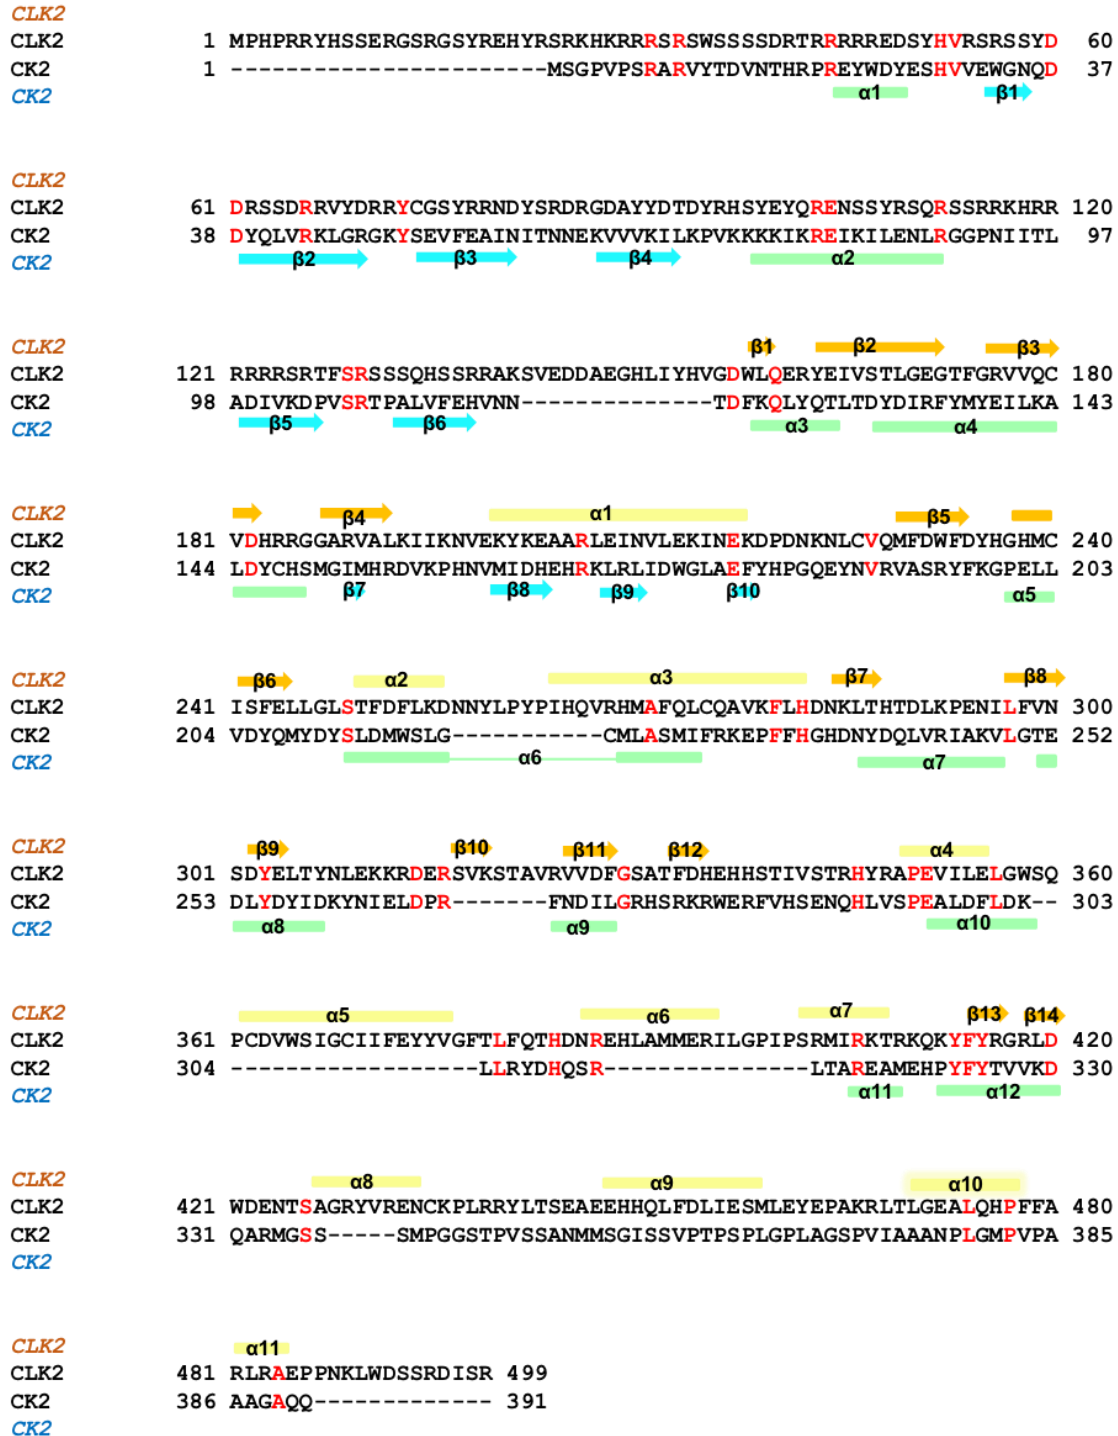

**Supplementary Figure 3. Structure-based sequence alignment of CLK2 and CK2.** Amino acid sequences from CLK2 and CK2 are aligned. Identical amino acids between CLK2 and CK2 are shown in red. The  $\alpha$ -helices and  $\beta$ -sheets (secondary structures) of CLK2 are colored in yellow and dark yellow, respectively. The  $\alpha$ -helices and  $\beta$ -sheets of CK2 are shown in light green and cyan, respectively.
